# Supplementary material for: FeNb2O6/reduced graphene oxide composites with intercalation pseudo-capacitance enabling ultrahigh energy density for lithium-ion capacitors
Source: Royal Society of Chemistry journal article supplement (doi:10.1039/d1ra03198h), 2021-01-01
Supplement: d1ra03198h1.pdf [file d1ra03198h1.pdf]

**FeNb<sub>2</sub>O<sub>6</sub>/reduced graphene oxide composites with intercalation pseudo-capacitive enabling ultrahigh energy density for lithium-ion capacitors**

Shuying Kong<sup>a+\*</sup>, Xu Zhang<sup>b+</sup>, Binbin Jin<sup>a</sup>, Xiaogang Guo<sup>a</sup>, Guoqing Zhang<sup>a</sup>,

Huisheng Huang<sup>a</sup>, Xinzhu Xiang<sup>a</sup>, Kui Cheng<sup>c\*</sup>

*a. Chongqing Key Laboratory of Inorganic Special Functional Materials, College of Chemistry and Chemical Engineering, Yangtze Normal University, Chong Qing 404100, China*

*b. School of Materials Science and Engineering, and Ningxia Research Center of Silicon Target and Silicon-Carbon Negative Materials Engineering Technology, North Minzu University, Yinchuan 750021, China*

*c. College of Engineering, Northeast Agricultural University, Harbin 150030, China*

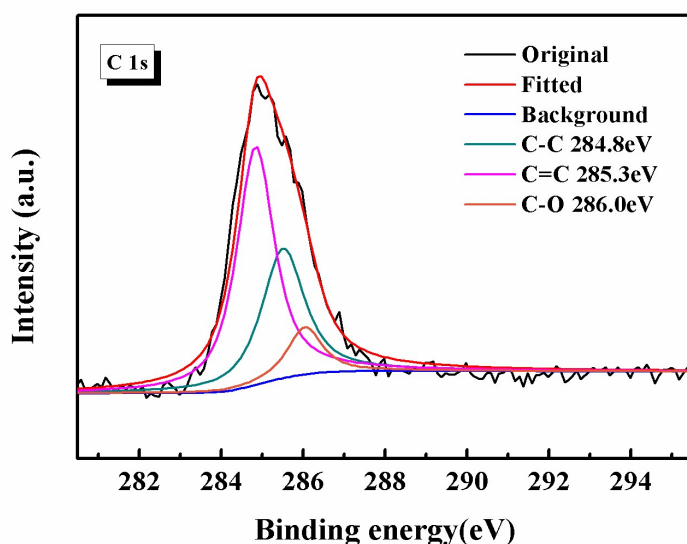

**Figure S1 The XPS spectra of C 1s**

[+] These authors contributed equally to this work

[\*] Corresponding author. E-mail address: kongshuying@126.com (Shuying Kong), [chengkui@hrbeu.edu.cn](mailto:chengkui@hrbeu.edu.cn) (Kui Cheng).

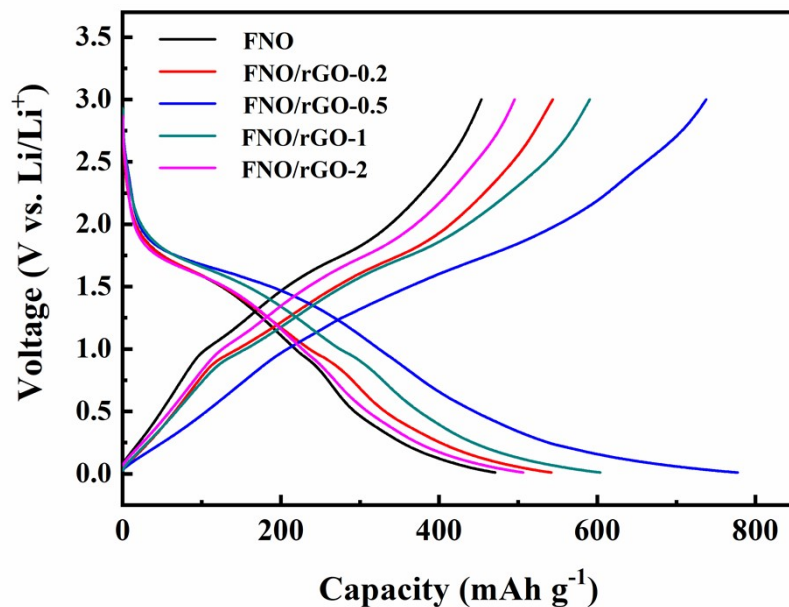

Figure S2 The GCD curves of the FNO/rGO composites prepared with different concentrations of GO at  $0.05 \text{ A g}^{-1}$  from 0.01 to 3.0 V

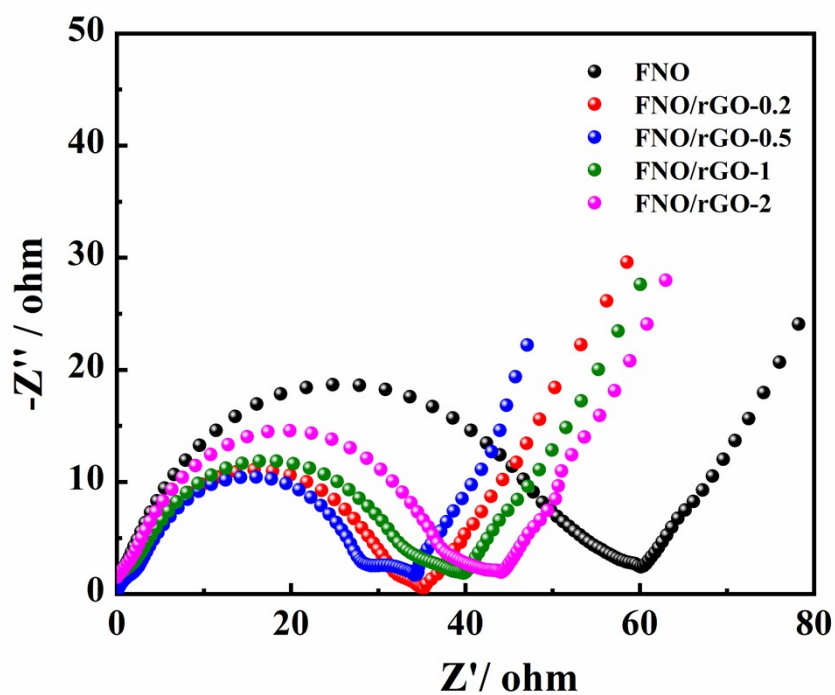

Figure S3 The Nyquist plots of the FNO/rGO composites prepared with different concentrations of GO

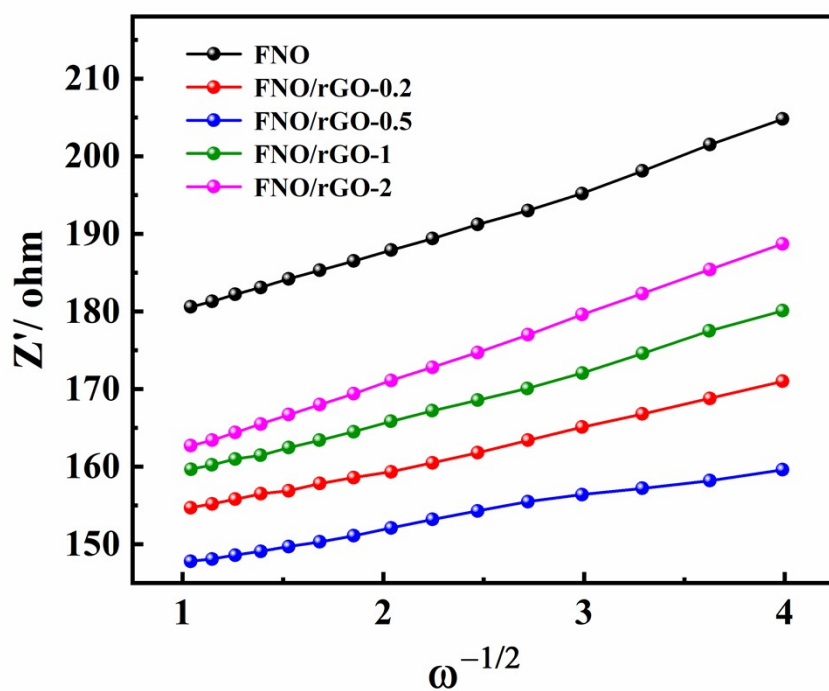

**Figure S4** Relationship plot of impedance as a function of the inverse square root of the angular frequency in the Warburg region of the FNO/rGO composites prepared with different concentrations of GO.

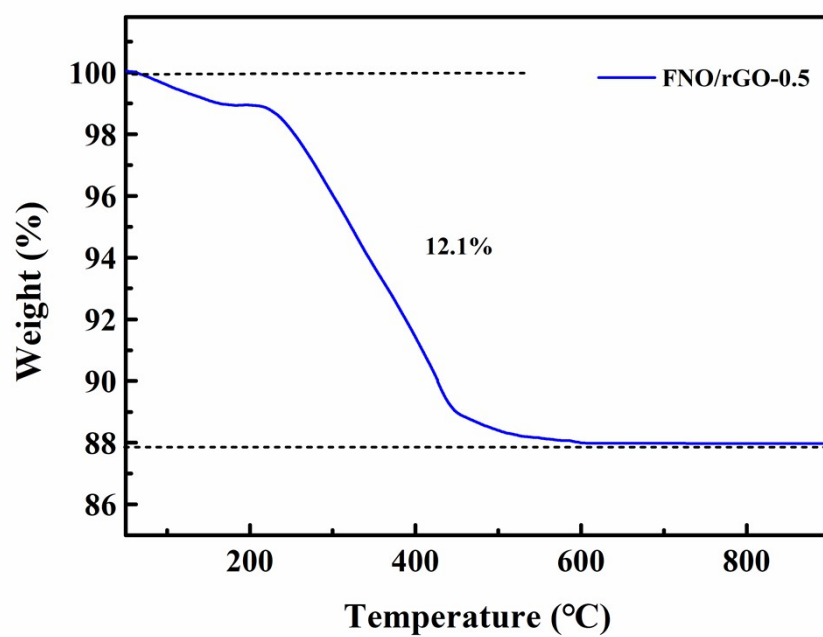

**Figure S5** The TG curves of the FNO/rGO-0.5 composites

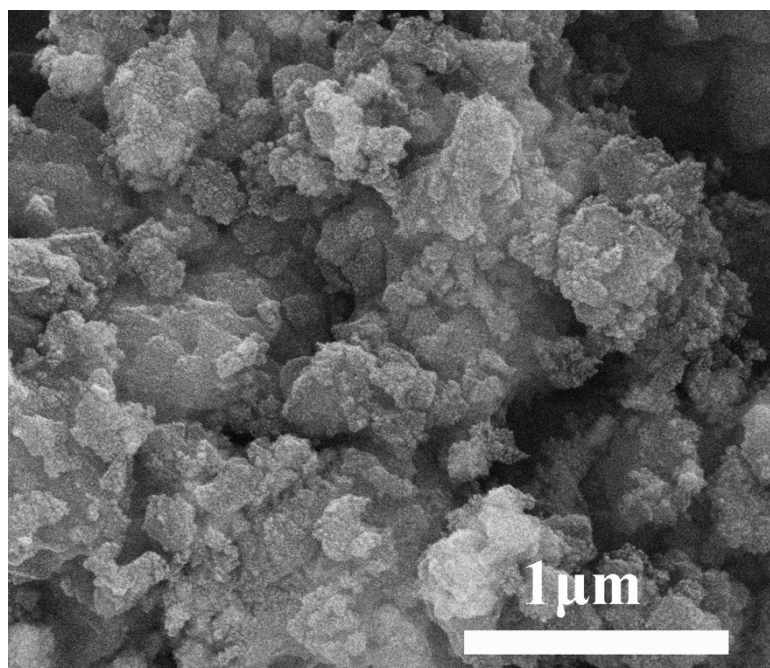

**Figure S6** The SEM of the FNO/rGO-0.5 composites after cycling

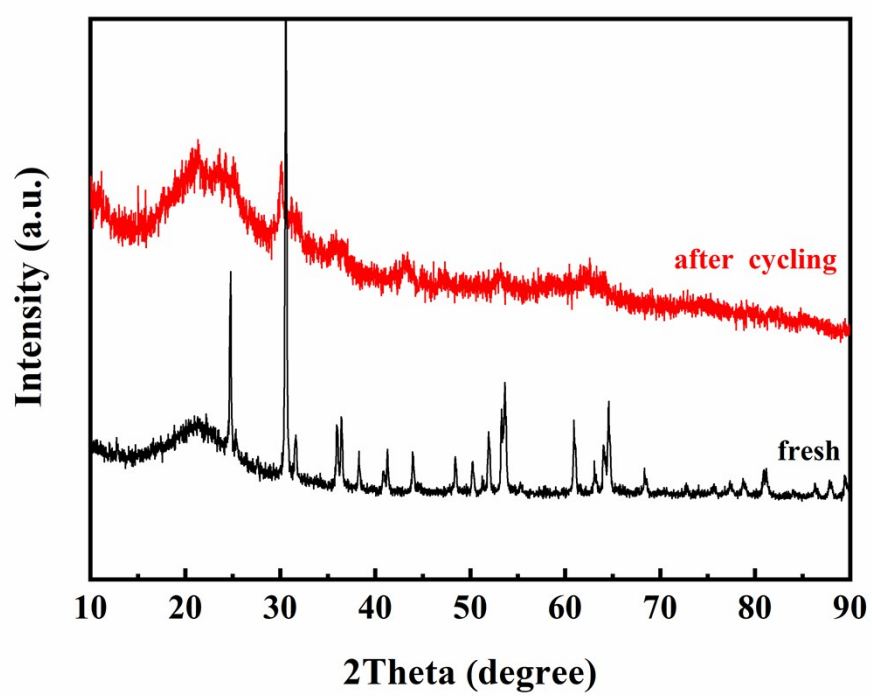

**Figure S7** The XRD of the FNO/rGO-0.5 composites after cycling

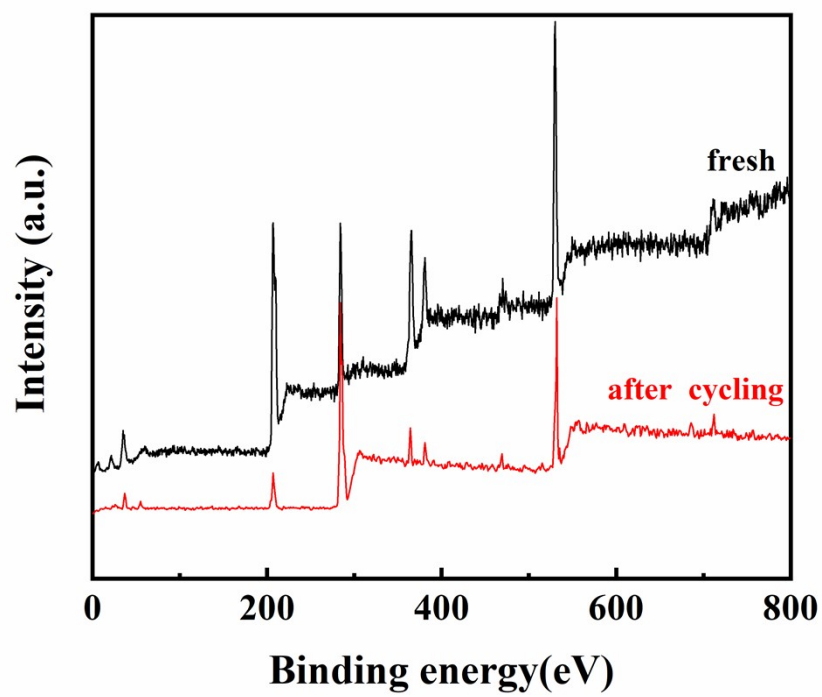

**Figure S8 The XPS of the FNO/rGO-0.5 composites after cycling**
